# Supplementary material for: Growth differentiation factor-15 slows the growth of murine prostate cancer by stimulating tumor immunity
Source: PubMed Central journal article supplement (PMC7274405; doi:10.1371/journal.pone.0233846), 2020-06-05
Supplement: pone.0233846.s001.pdf [file pone.0233846.s001.pdf]

## **Growth Differentiation Factor-15 slows the growth of murine prostate cancer by stimulating tumor immunity**

Yasmin Husaini<sup>1</sup>, Vicky Wang-Wei Tsai<sup>1</sup>, Rakesh Manandhar<sup>1</sup>, Hong Ping Zhang<sup>1</sup>, Ka Ki Michelle Lee-Ng<sup>1</sup>, H el ene Lebhar<sup>2</sup>, Christopher P. Marquis<sup>2</sup>, David A. Brown<sup>1,3</sup>, Samuel N. Breit<sup>1\*</sup>.

### **Supplementary methods**

#### **Mouse genotyping**

Transgenic mice were identified by PCR on DNA extracted from tail samples, using the transgene specific primers identified in the identified below.

#### **1. For PB-SV40 T antigen sequence in TRAMP mice:**

Pb-forward: 5'-CCGGTCGACCGGAAGCTTCCACAAGTGCATTTA-3' and  
SV40Tag-reverse: 5'-CTCCTTTCAAGACCTAGAAGGTCCA-3'.

#### **2. For GDF15 transgene in TRAMP<sup>fmsmic-1</sup> mice:**

171MIC1 Flag-forward: 5'-GACTACAAGGACGACGATGACAAG-3' and  
172MIC1MS8-reverse: 5'-CTCGGTGCACGCGGTAGGCTTCG-3'.

#### **3. For RAG-KO mice:**

1179\_RAG1-KO-U1: TGGATGTGGAATGTGTGCGAG

1188\_RAG1-WT-U1: GAGGTTCCGCTACGACTCTG

1189\_RAG1-WT-L1: CCGGACAAGTTTTTCATCGT

#### **Detection of TRAMP tumor infiltrating lymphocytes**

Lymphocytes were identified following the gating strategy shown in S1 Fig. After identifying leukocytes using anti-CD45<sup>+</sup>, the antibodies used in Supplementary Table S1 identified T cells (CD3<sup>+</sup>), CD4 T cells (CD3<sup>+</sup>CD4<sup>+</sup>) CD8 T cells (CD3<sup>+</sup>CD8<sup>+</sup>), CD11c expressing CD8 cells (CD3<sup>+</sup>CD8<sup>+</sup>CD11c<sup>+</sup>), T cells bearing both CD4 and

CD8 (CD3<sup>+</sup>CD4<sup>+</sup>CD8<sup>+</sup>), T cells with no CD4 or CD8 which may be gamma delta T cells (CD3<sup>+</sup>CD4<sup>-</sup>CD8<sup>-</sup>), NK cells (CD3<sup>-</sup>CD11c<sup>-</sup>CD11b<sup>-</sup>B220<sup>-</sup>NK1.1<sup>+</sup>) and B cells (CD3<sup>-</sup>CD11c<sup>-</sup>CD11b<sup>-</sup>B220<sup>+</sup>NK1.1<sup>-</sup>).

### ***In vivo* CD8 T cell depletion**

To validate CD8 T depletion procedure, we depleted CD8 T cells from WT mice by twice weekly intraperitoneal injection of 400µg of rat anti-CD8-α monoclonal antibody (clone 2.43, Bio X Cell). A control was similarly injected with 400ug of isotype matched control rat anti KLH antibody (Clone LTF-2, Bio X Cell). After one week spleen and axillary and brachial lymph nodes were collected, dispersed to single cell suspension and 1 million cells were stained with CD45-PerCP, CD3-BV21 and CD8B-BV786 (Clone H35-17.2, BD Biosciences) and subjected to flow cytometry. Flow cytometry results indicated that there was essentially depletion of CD8 T cells in both spleen and lymph nodes (S2 Table).
