# Supplementary material for: Growth differentiation factor-15 slows the growth of murine prostate cancer by stimulating tumor immunity
Source: PubMed Central journal article supplement (PMC7274405; doi:10.1371/journal.pone.0233846), 2020-06-05
Supplement: pone.0233846.s002.pdf [file pone.0233846.s002.pdf]

# Lymphocytes

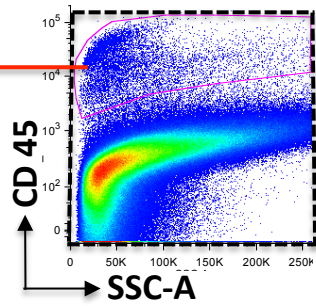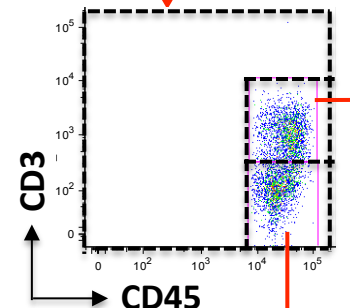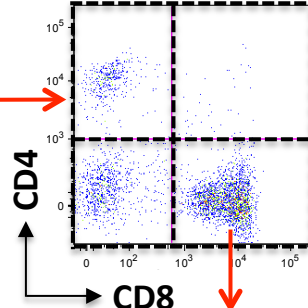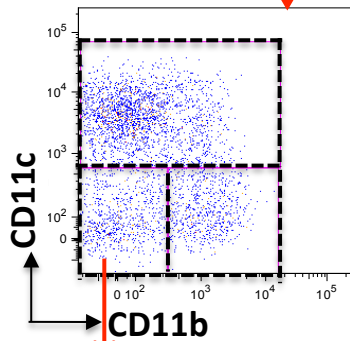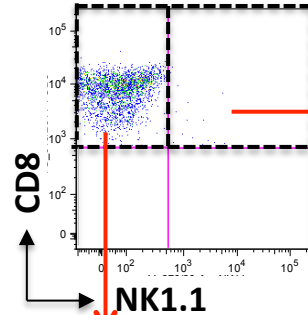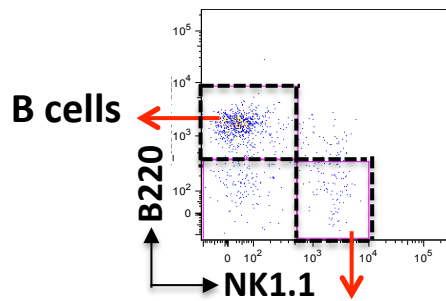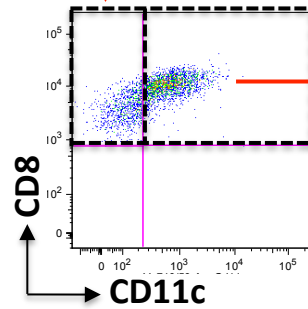

NK cells

T cells
